# Supplementary material
Source: Research Square preprint supplement (doi:10.21203/rs.3.rs-9879994/v1)
Supplement: Supplementary file 1 [file b4270a5f51f721bb2d2c2997.docx]

### Supplementary Materials

**Table S1. shRNA sequences targeting TACSTD2/TROP2**

| Gene | shRNA ID | Target sequence (5’ −> 3’) | Clone ID | Vector |
| --- | --- | --- | --- | --- |
| TACSTD2 | Sh1 | GCGGCAGAACACGTCTCAGAA | TRCN0000056418 | Plko.1 puro |
| TACSTD2 | Sh2 | GAGAAAGGAACCGAGCTTGTA | TRCN0000056419 | Plko.1 puro |
| TACSTD2 | Sh3 | CGTGGACAACGATGGCCTCTA | TRCN0000056421 | Plko.1 puro |

**Table S1. shRNA sequences targeting TACSTD2/TROP2.**

Target sequences, clone IDs, and vector information for shRNAs targeting TACSTD2/TROP2 used in this study.


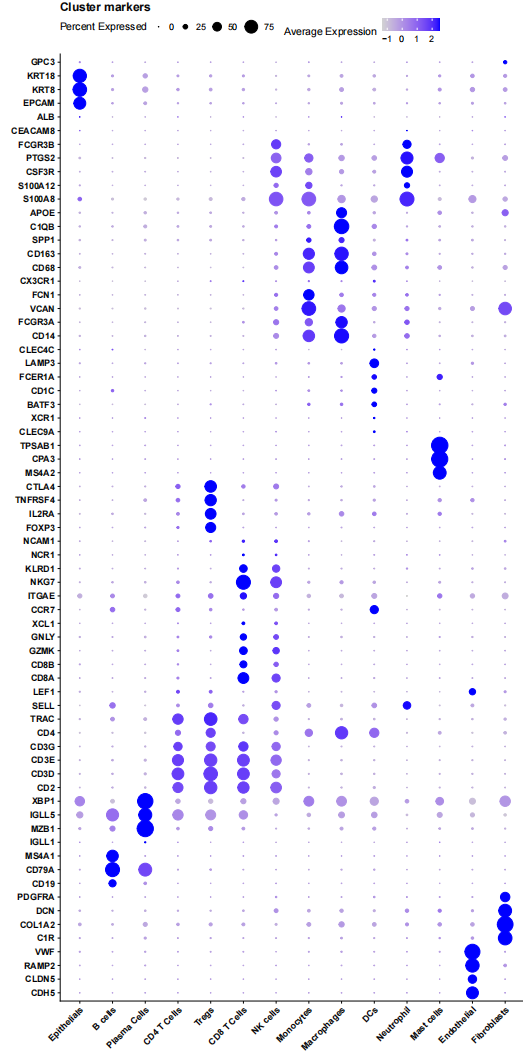


**Figure.S1 Distribution of each marker gene on the UMAP plot.**


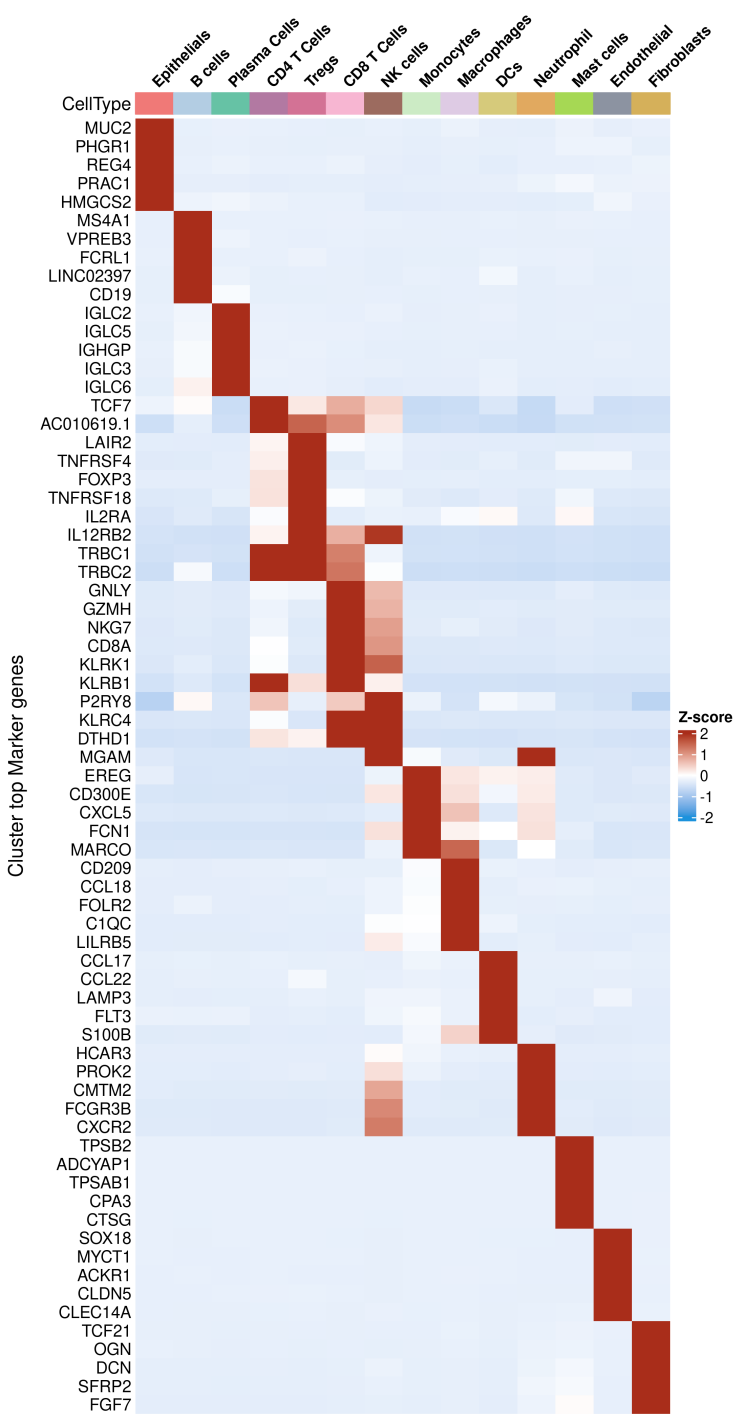


**Figure.S2 Heatmap of top marker genes for each cluster delineating major cellular identities.UMAP, Uniform Manifold Approximation and Projection. CRC, colorectal cancer.**


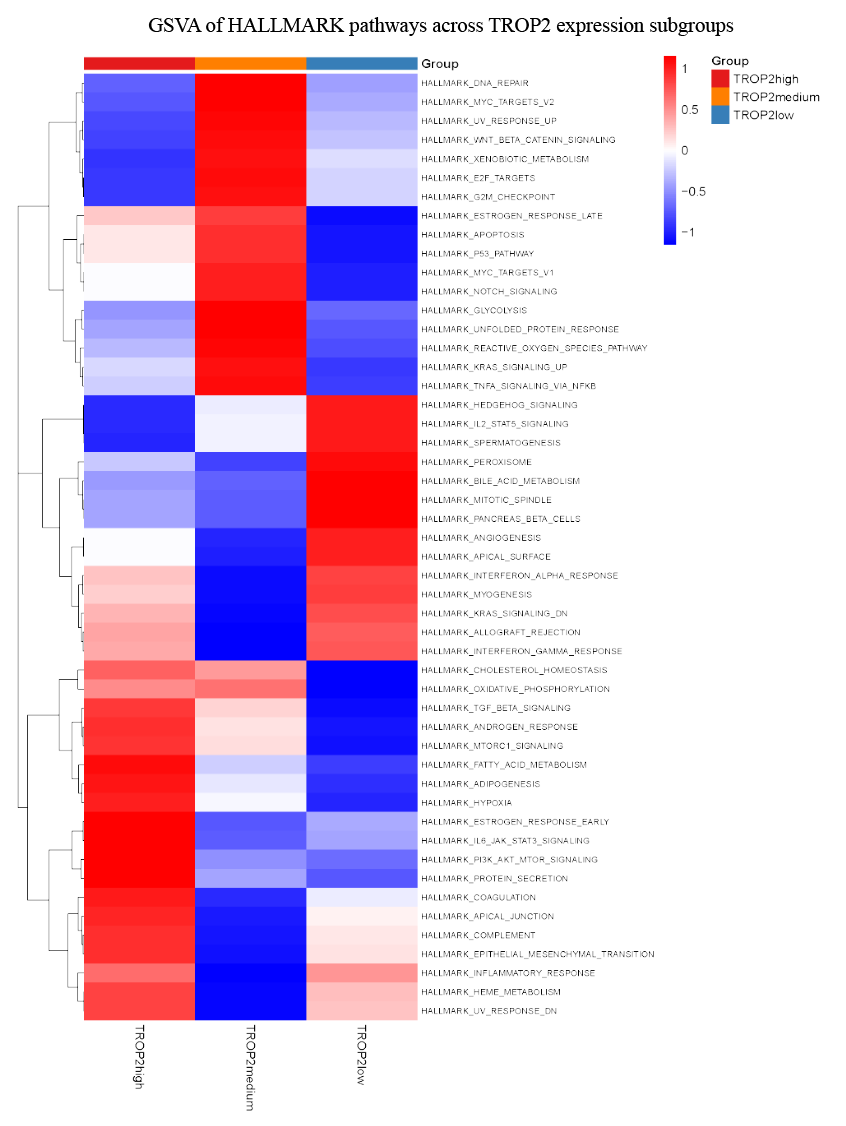


**Figure S3. GSVA heatmap of HALLMARK pathways across TROP2 epithelial subgroups.**

Heatmap showing GSVA-based HALLMARK pathway activity across TROP2-high, TROP2-medium, and TROP2-low epithelial subgroups.


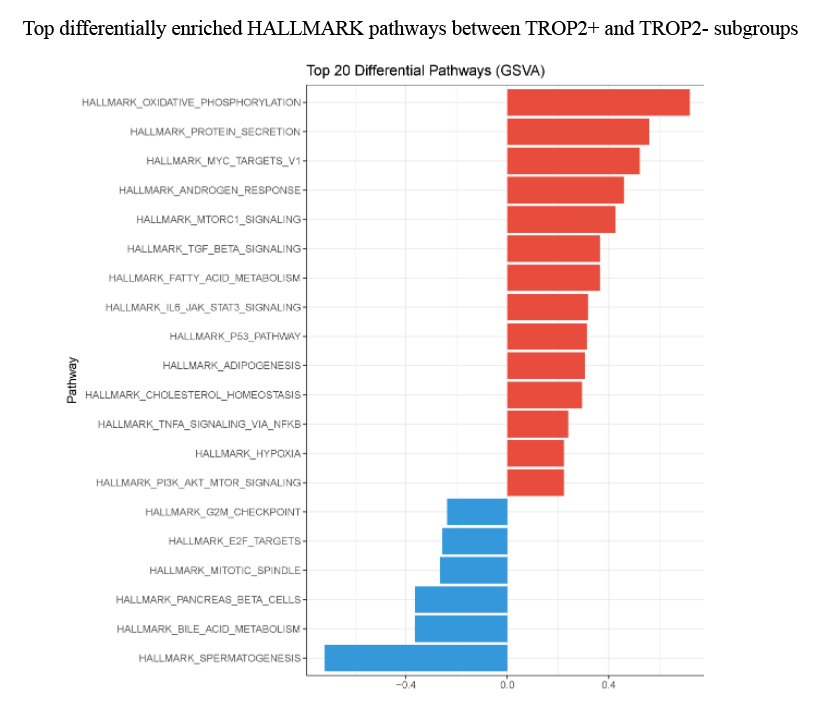


**Figure S4. Top differentially enriched HALLMARK pathways between TROP2⁺ and TROP2⁻ epithelial subgroups.**

Bar plot or enrichment summary showing the top HALLMARK pathways differentially enriched between TROP2⁺ and TROP2⁻ malignant epithelial cells.


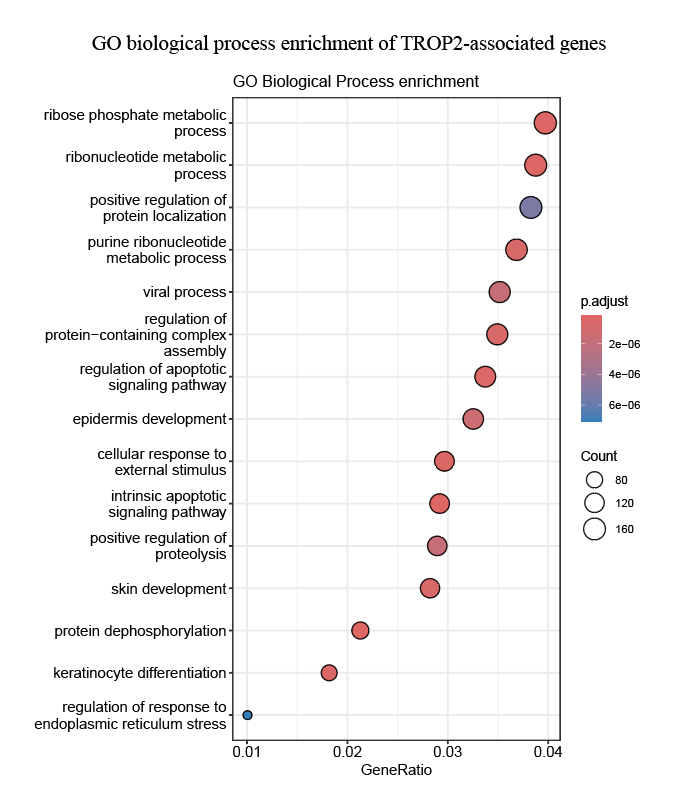


**Figure S5. GO biological process enrichment analysis.**

Gene Ontology biological process enrichment analysis of genes associated with TROP2-defined epithelial states.


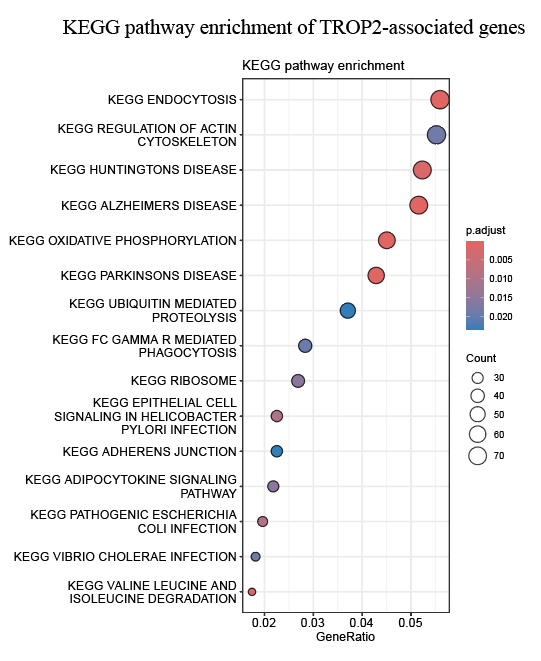


**Figure S6. KEGG pathway enrichment analysis.**

KEGG pathway enrichment analysis of genes associated with TROP2-defined epithelial states.


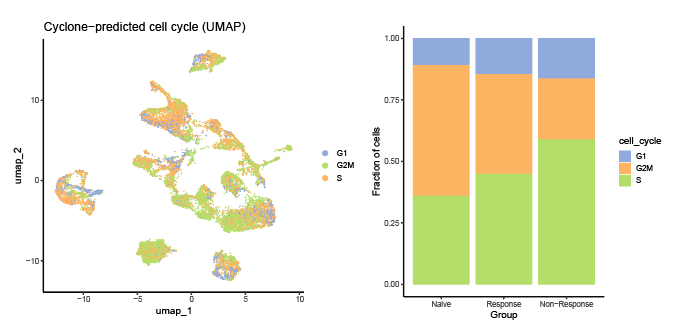


**Figure S7. Cyclone-based cell-cycle analysis of CRC single-cell transcriptomes.**

(A) UMAP plot showing Cyclone-predicted G1, S, and G2/M phases in CRC single-cell transcriptomes.

(B) Bar plot showing the fraction of cells assigned to each cell-cycle phase across Naive, Response, and Non-Response groups.
